# Supplementary material for: Divergence in cell cycle progression is associated with shifted phenology in a multivoltine moth: the European corn borer, Ostrinia nubilalis
Source: Oxford University Press journal article supplement (doi:10.1242/jeb.245244), 2023-05-19
Supplement: jeb245244supp.pdf [file jeb245244supp.pdf]

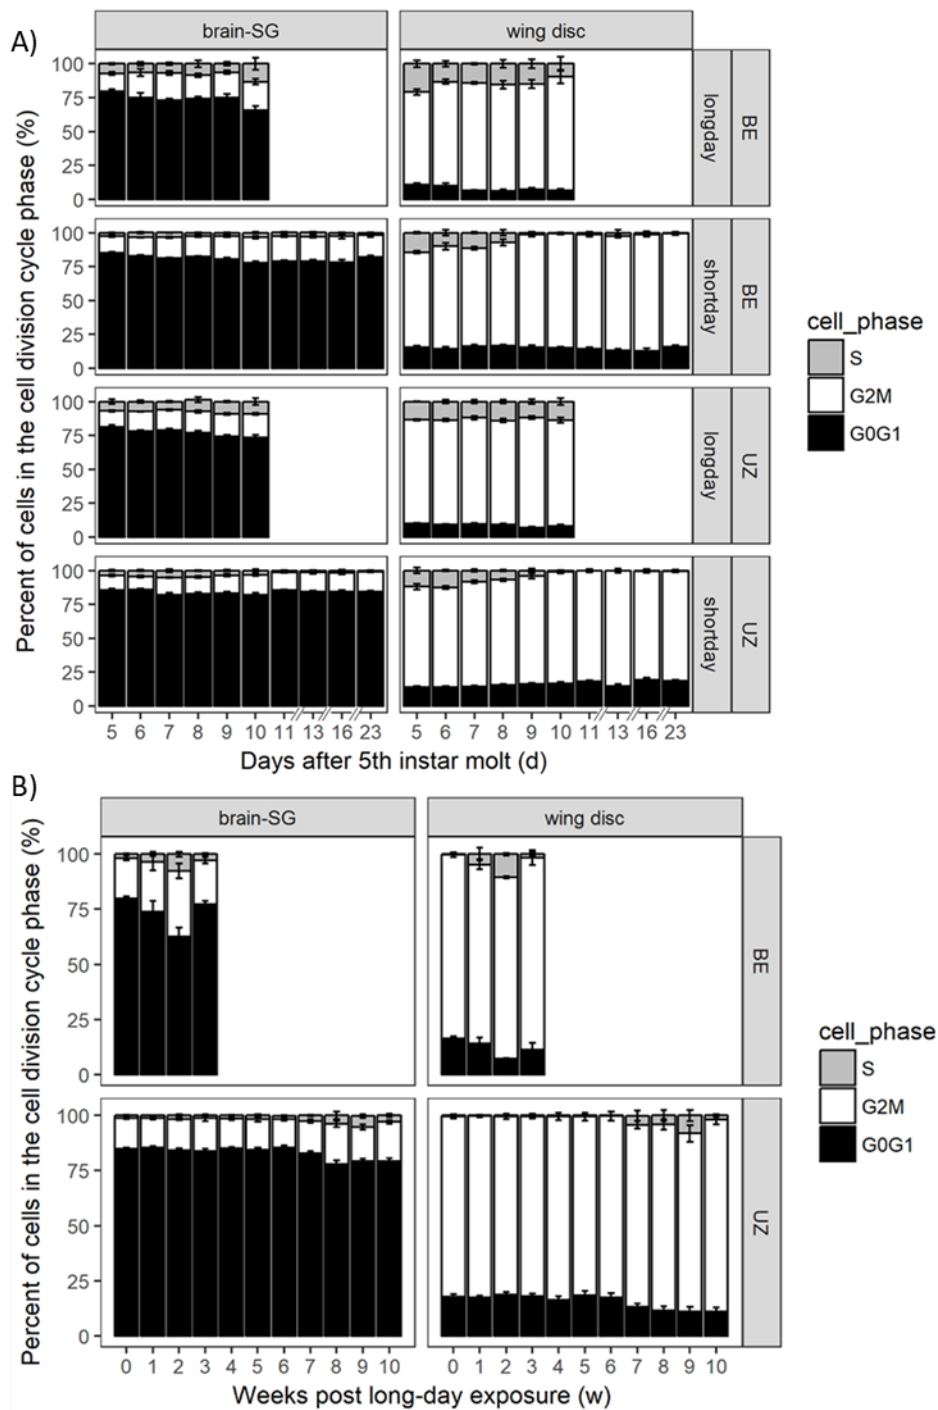

**Fig. S1.** Overall descriptions of the proportion of cells in each tissue in each phase of the cell cycle A) from long-day and short-day conditions and B) after long-day exposure between the two strains. The top of each box represents the mean and bars represent the standard error, although these bars are sometimes subsumed within the symbols.

**Table S1. Oligonucleotides used for qRT-PCR.**

| Gene coding for | Forward (5'–3')          | Reverse (5'–3')          |
|-----------------|--------------------------|--------------------------|
| PCNA            | GGACAACCTCTCACGTATCTCTTG | CGGTGCTAGGTAGTAACGAATG   |
| cyclin A        | CACTCTGCTGTCCATACTCATC   | GCATCCTATCGATGTCCATCTC   |
| cyclin B        | GGGAATCTTCGCCAGTTCATAG   | CATGTTTCATCGCCAGCAAATAC  |
| cyclin D        | CTCATCTTCTACACAGCCAACA   | AGTACAGCGTGAAGTGGTAATC   |
| cyclin E        | TGTTTGACAGGCACCCTAATC    | GCAGCTATGAAGAGACACGTTAT  |
| E2F1            | AACGGACGACATCGACAATC     | GAGCCTTTCCACTTCACTATCC   |
| polo            | TGGCCCTTCTTCGTCAATATC    | TTGGCTTCCACAGCTTCTT      |
| RPS03           | ATACAAACTTATCGGAGGTCTCG  | ATGATCTTTACCTTGATTCCAAGC |

**Table S2.** Betareg model fits for proportions of cells in G0/G1, G2/M, and S phases of cell cycle division after exposure to diapause-termination conditions between the two strains through time. Data of proportions of cells for each cell cycle phase from days 32, 39, 46 and 53 after 5<sup>th</sup> instar molt were analyzed. These models match with the data in Fig. 5.

| Model                   | Df    | Chisq  | P_value              |
|-------------------------|-------|--------|----------------------|
| Brain-SG × G0/G1 phase  |       |        |                      |
| Strain                  | 1, 23 | 55.929 | <0.000*              |
| Day                     | 3, 21 | 23.692 | <0.000*              |
| Strain*Day              | 3, 21 | 13.854 | 0.003*               |
| Brain-SG × G2/M phase   |       |        |                      |
| Strain                  | 1, 23 | 48.121 | <0.000*              |
| Day                     | 3, 21 | 14.021 | 0.003*               |
| Strain*Day              | 3, 21 | 9.290  | 0.026*               |
| Brain-SG × S phase      |       |        |                      |
| Strain                  | 1, 23 | 43.956 | <0.000*              |
| Day                     | 3, 21 | 31.073 | <0.000*              |
| Strain*Day              | 3, 21 | 10.109 | 0.018*               |
| Wing disc × G0/G1 phase |       |        |                      |
| Strain                  | 1, 23 | 30.475 | <0.000*              |
| Day                     | 3, 21 | 7.371  | 0.0614 <sup>ns</sup> |
| Strain*Day              | 3, 21 | 14.683 | 0.002*               |
| Wing disc × G2/M phase  |       |        |                      |
| Strain                  | 1, 23 | 4.722  | 0.030*               |
| Day                     | 3, 21 | 5.853  | 0.119 <sup>ns</sup>  |
| Strain*Day              | 3, 21 | 7.654  | 0.054 <sup>ns</sup>  |
| Wing disc × S phase     |       |        |                      |
| Strain                  | 1, 23 | 18.647 | <0.000*              |
| Day                     | 3, 21 | 45.382 | <0.000*              |
| Strain*Day              | 3, 21 | 15.931 | 0.001*               |

ns, non-significant. Starred terms are significant at  $P < 0.05$ .

**Table S3.** Betareg model fits for transcript abundance of a series of cell cycle regulators (*cyclin A*, *cyclin B*, *cyclin D*, *cyclin E*, *E2F1*, *PCNA* and *polo*) in the brain-SGs of long-day and short-day 5<sup>th</sup> instar larvae of UZ strain of *Ostrinia nubilalis*. Data of transcript abundance for each gene from days 5, 6, 7, 8, 9, and 10 were analyzed. These models match with the data in Fig. 7.

| Model            | Df   | Chisq  | P_value             |
|------------------|------|--------|---------------------|
| <i>cyclin A</i>  |      |        |                     |
| Photoperiod      | 1,17 | 32.811 | <0.000*             |
| Day              | 5,13 | 10.684 | 0.058 <sup>ns</sup> |
| Photoperiod *Day | 5,13 | 38.463 | <0.000*             |
| <i>cyclin B</i>  |      |        |                     |
| Photoperiod      | 1,17 | 17.179 | <0.000*             |
| Day              | 5,13 | 16.308 | 0.006*              |
| Photoperiod *Day | 5,13 | 21.640 | <0.000*             |
| <i>cyclin D</i>  |      |        |                     |
| Photoperiod      | 1,17 | 55.322 | <0.000*             |
| Day              | 5,13 | 5.701  | 0.336 <sup>ns</sup> |
| Photoperiod *Day | 5,13 | 10.992 | 0.052 <sup>ns</sup> |
| <i>cyclin E</i>  |      |        |                     |
| Photoperiod      | 1,17 | 51.911 | <0.000*             |
| Day              | 5,13 | 7.030  | 0.218 <sup>ns</sup> |
| Photoperiod *Day | 5,13 | 41.161 | <0.000*             |
| <i>E2F1</i>      |      |        |                     |
| Photoperiod      | 1,17 | 7.134  | 0.007*              |
| Day              | 5,13 | 7.019  | 0.219 <sup>ns</sup> |
| Photoperiod *Day | 5,13 | 16.790 | 0.005*              |
| <i>PCNA</i>      |      |        |                     |
| Photoperiod      | 1,17 | 17.955 | <0.000*             |
| Day              | 5,13 | 9.990  | 0.076 <sup>ns</sup> |
| Photoperiod *Day | 5,13 | 34.500 | <0.000*             |
| <i>polo</i>      |      |        |                     |
| Photoperiod      | 1,17 | 41.178 | <0.000*             |
| Day              | 5,13 | 7.278  | 0.201 <sup>ns</sup> |
| Photoperiod *Day | 5,13 | 42.459 | <0.000*             |

ns, non-significant. Starred terms are significant at  $P < 0.05$ .

**Table S4.** Betareg model fits for transcript abundance of a series of cell cycle regulators (*cyclin A*, *cyclin B*, *cyclin D*, *cyclin E*, *E2F1*, *PCNA* and *polo*) in the brain-SGs of UZ and BE strain larvae of *Ostrinia nubilalis* during the diapause maintenance phase. These models match with the data to the left of the vertical dashed line in Fig. 8 (days 10, 16, 23 and 32 after 5<sup>th</sup> instar molt), representing the diapause-maintenance phase.

| Model           | Df    | Chisq  | P_value             |
|-----------------|-------|--------|---------------------|
| <i>cyclin A</i> |       |        |                     |
| Strain          | 1, 11 | 0.012  | 0.912 <sup>ns</sup> |
| Day             | 3, 9  | 9.317  | 0.025 <sup>ns</sup> |
| Strain *Day     | 3, 9  | 16.989 | <0.000*             |
| <i>cyclin B</i> |       |        |                     |
| Strain          | 1, 11 | 22.654 | <0.000*             |
| Day             | 3, 9  | 3.212  | 0.360 <sup>ns</sup> |
| Strain *Day     | 3, 9  | 2.835  | 0.418 <sup>ns</sup> |
| <i>cyclin D</i> |       |        |                     |
| Strain          | 1, 11 | 5.905  | 0.015*              |
| Day             | 3, 9  | 5.164  | 0.160 <sup>ns</sup> |
| Strain *Day     | 3, 9  | 4.214  | 0.239 <sup>ns</sup> |
| <i>cyclin E</i> |       |        |                     |
| Strain          | 1, 11 | 6.706  | 0.010*              |
| Day             | 3, 9  | 27.632 | <0.000*             |
| Strain *Day     | 3, 9  | 9.238  | 0.026*              |
| <i>E2F1</i>     |       |        |                     |
| Strain          | 1, 11 | 0.778  | 0.378 <sup>ns</sup> |
| Day             | 3, 9  | 4.999  | 0.172 <sup>ns</sup> |
| Strain *Day     | 3, 9  | 15.018 | 0.002*              |
| <i>PCNA</i>     |       |        |                     |
| Strain          | 1, 11 | 7.859  | 0.005*              |
| Day             | 3, 9  | 28.380 | <0.000*             |
| Strain *Day     | 3, 9  | 38.903 | <0.000*             |
| <i>polo</i>     |       |        |                     |
| Strain          | 1, 11 | 0.001  | 0.981 <sup>ns</sup> |
| Day             | 3, 9  | 32.510 | <0.000*             |
| Strain *Day     | 3, 9  | 3.653  | 0.302 <sup>ns</sup> |

ns, non-significant. Starred terms are significant at  $P < 0.05$ .

**Table S5.** Betareg model fits for transcript abundance of a series of cell cycle regulators (*cyclin A*, *cyclin B*, *cyclin D*, *cyclin E*, *E2F*, *PCNA* and *polo*) in the brain-SGs of UZ and BE strain larvae of *Ostrinia nubilalis* during the diapause termination phase. These models match with the data to the right of the vertical dashed line in Fig. 8 (days 32, 39, 46 and 53 after 5<sup>th</sup> instar molt), representing the diapause-termination phase.

| Model           | Df    | Chisq  | P_value             |
|-----------------|-------|--------|---------------------|
| <i>cyclin A</i> |       |        |                     |
| Strain          | 1, 11 | 0.425  | 0.515 <sup>ns</sup> |
| Day             | 3, 9  | 7.622  | 0.054 <sup>ns</sup> |
| Strain *Day     | 3, 9  | 4.453  | 0.216 <sup>ns</sup> |
| <i>cyclin B</i> |       |        |                     |
| Strain          | 1, 11 | 34.167 | <0.000*             |
| Day             | 3, 9  | 7.093  | 0.069 <sup>ns</sup> |
| Strain *Day     | 3, 9  | 5.381  | 0.146 <sup>ns</sup> |
| <i>cyclin D</i> |       |        |                     |
| Strain          | 1, 11 | 25.570 | <0.000*             |
| Day             | 3, 9  | 16.979 | <0.000*             |
| Strain *Day     | 3, 9  | 30.244 | <0.000*             |
| <i>cyclin E</i> |       |        |                     |
| Strain          | 1, 11 | 6.490  | 0.011*              |
| Day             | 3, 9  | 9.409  | 0.024*              |
| Strain *Day     | 3, 9  | 4.758  | 0.190 <sup>ns</sup> |
| <i>E2F1</i>     |       |        |                     |
| Strain          | 1, 11 | 11.801 | 0.001*              |
| Day             | 3, 9  | 2.210  | 0.530 <sup>ns</sup> |
| Strain *Day     | 3, 9  | 7.184  | 0.066 <sup>ns</sup> |
| <i>PCNA</i>     |       |        |                     |
| Strain          | 1, 11 | 17.958 | <0.000*             |
| Day             | 3, 9  | 20.395 | <0.000*             |
| Strain *Day     | 3, 9  | 19.427 | <0.000*             |
| <i>polo</i>     |       |        |                     |
| Strain          | 1, 11 | 8.089  | 0.004*              |
| Day             | 3, 9  | 10.414 | 0.015*              |
| Strain *Day     | 3, 9  | 14.398 | 0.002*              |

ns, non-significant. Starred terms are significant at  $P < 0.05$ .
